# Supplementary material
Source: PubMed Central journal article supplement (PMC6990977)
Supplement: jamaophthalmol-138-190-s001.pdf [file jamaophthalmol-138-190-s001.pdf]

## Supplementary Online Content

1  
2  
3  
4  
5  
6  
7  
8  
9  
10  
11  
12  
13  
14  
15  
16

Wang M, Tichelaar J, Pasquale LR, et al. Characterization of central visual field loss in end-stage glaucoma by unsupervised artificial intelligence. *JAMA Ophthalmol*. Published online January 2, 2020. doi:10.1001/jamaophthalmol.2019.5413

**eMethods.** Identification of Representative Patterns of 24-2 VF in End-Stage Glaucoma

**eFigure 1.** The 18 Representative Archetype Patterns of 24-2 VFs and an Example of the VF Decomposition

**eFigure 2.** The Archetype VF Patterns Obtained From 197 Combined 24-2 and 10-2 VFs Tested on the Same Dates

This supplementary material has been provided by the authors to give readers additional information about their work.

17 **eMethods. Identification of Representative Patterns of 24-2 VF in End-Stage Glaucoma**

18 The most recent reliable 7,680 VFs (average MD:  $-25.5 \pm 2.6$  dB) from 7,680 eyes were used to identify  
19 the representative patterns of 24-2 VF in end-stage glaucoma. eFigure 1 (a) shows the 18 representative  
20 archetype patterns of 24-2 VFs in end-stage glaucoma ( $MD \leq -22$  dB). The 18 archetypes include diffuse  
21 loss (archetype 1), temporal island (archetypes 9 and 12), various central island patterns (archetypes 2, 7,  
22 8, 10, 15 and 16), inferior island patterns (archetypes 4 and 13), superior sparing (archetype 3), quadrant  
23 sparing (archetypes 5, 6, 14 and 17), and nasal (archetype 11) or temporal hemianopia patterns (archetype  
24 18). The 18 archetypes are ordered by their respective decomposition weights, which reflect the  
25 contribution of each archetype over the entire set of visual fields, and can be interpreted as the relative  
26 importance of this archetype in the dataset (eFigure 1 (a)). The most prevalent archetype was archetype 1,  
27 which represents diffuse VF loss. Our model allows any arbitrary 24-2 VF with  $MD \leq -22$  dB to be  
28 decomposed as a linear combination of those 18 archetypes, as illustrated in eFigure 1 (b). For each VF,  
29 the archetype with the largest decomposition coefficient is assigned as the primary archetype for that VF.  
30 eFigure 2 shows (a) the combined 24-2 and 10-2 VF patterns, (b) 24-2 patterns in isolation, and (c) 10-2  
31 patterns in isolation from 197 most recent pairs of 24-2 and 10-2 VFs tested on the same dates from 197  
32 eyes. It can be observed that the central VF captured by 24-2 VFs strongly corresponds to the detailed 10-  
33 2 VF measurements.

34

35 **eFigure 1.** The 18 Representative Archetype Patterns of 24-2 VFs and an Example of the VF  
36 Decomposition

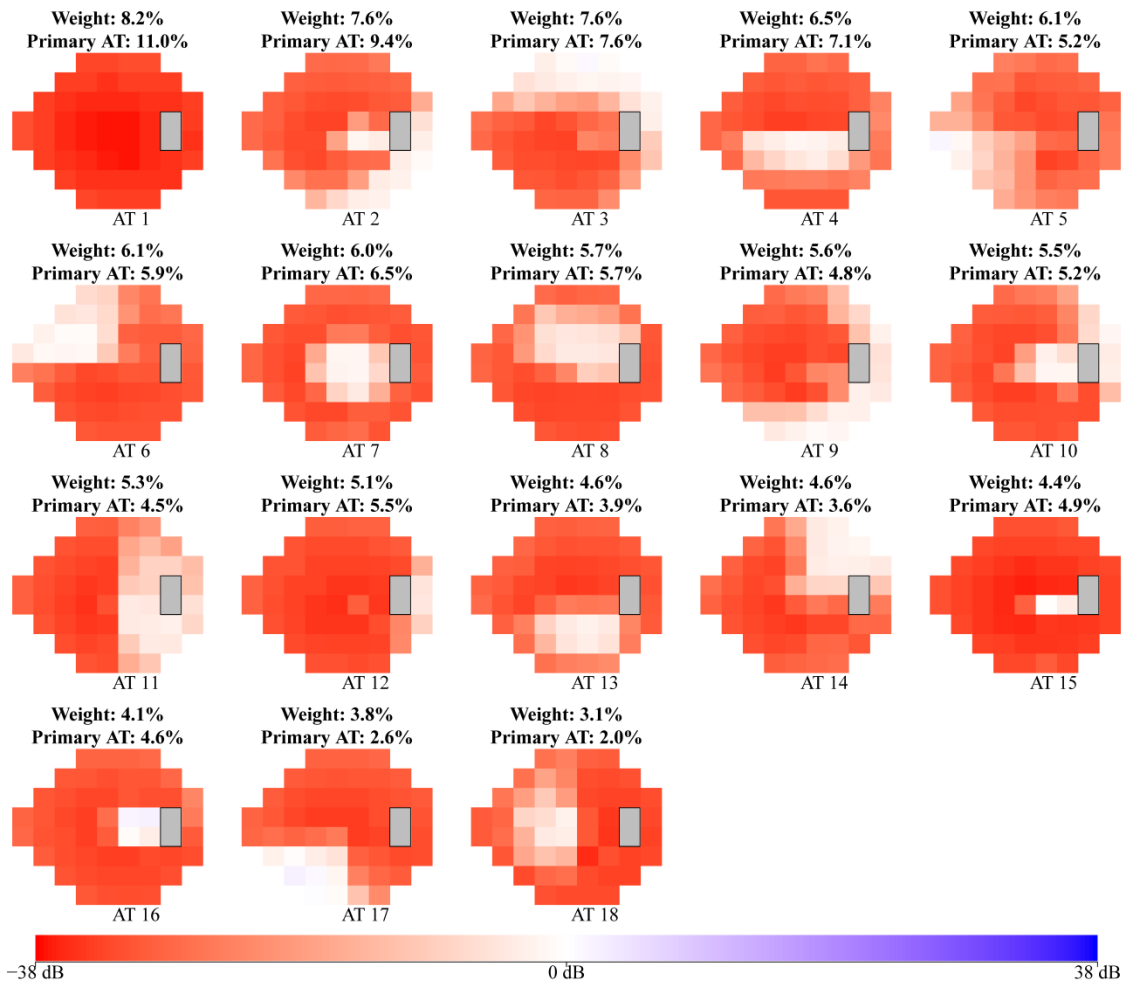

37

38

39

40

(a)

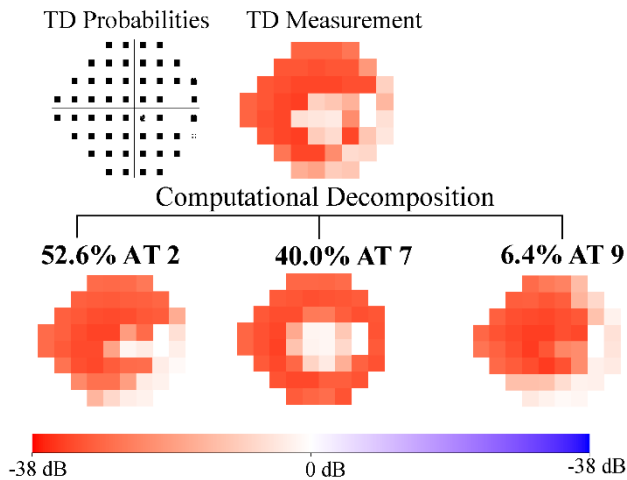

41

42

43

(b)

44 (a), The 18 representative archetype patterns of 24-2 VFs identified from the 7,680 most recent VFs of  
 45 7,680 eyes and (b), an example of the VF decomposition to the VF archetypes. The 18 archetypes are  
 46 ordered by their respective decomposition weights averaging over all VFs. Any VF with MD  $\leq$  -22 dB  
 47 can be decomposed as a linear combination of those 18 archetypes. For each VF, the archetype with the  
 48 largest decomposition coefficient is assigned as the primary archetype for that VF. The percentage of each  
 49 archetype as primary archetype over all VFs is also reported. VF = visual field; MD = mean deviation;  
 50 AT = archetype.

51

52

53 **eFigure 2.** The Archetype VF Patterns Obtained From 197 Combined 24-2 and 10-2 VFs Tested on the  
54 Same Dates

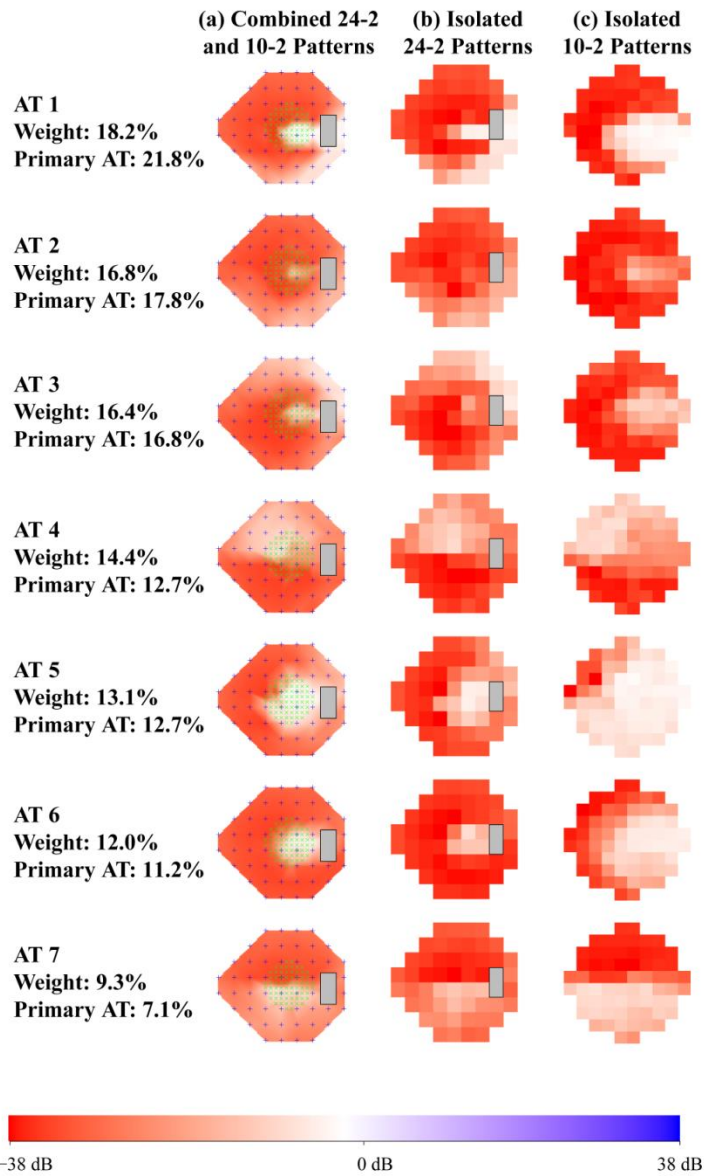

55  
56 (a) The combined 24-2 and 10-2 VF patterns with blue plus sign denoting 24-2 testing locations and  
57 green cross sign denoting 10-2 testing, (b) the isolated 24-2 VF patterns and (c) the isolated 10-2 VF  
58 patterns. Note that, the continuous total deviation values for the combined patterns in (a) were determined  
59 by linear interpolation of the total deviation values between the measurement locations. All VFs are  
60 plotted in right eye format. AT = archetype; VF = visual field.

61
